# Supplementary material for: A new species group in Megaselia, the lucifrons group, with description of a new species (Diptera, Phoridae)
Source: Zookeys. 2015 Jul 6;(512):89–108. doi: 10.3897/zookeys.512.9494 (PMC4523756; doi:10.3897/zookeys.512.9494)
Supplement: Supplementary material 1 [file zookeys-512-089-s001.xls]

## Sheet: Blad1
Table S1: Genbank accession numbers, locality, habitat information, and time of collection for the specimens used in this study. All specimens, except LA208 and LA209, which were caught by hand, come from the Swedish Malaise Trap Project (SMTP). All specimens are deposited in the collection of the Swedish Museum of Natural History.
		Genbank #				Locality
Species	Taxon ID	COI	28S	Collection ID	Trap ID	Latitude	Longitude	Start date	Emptying date	Habitat
Megaselia bifida	LA001	KP693289	KP693181	1610	9	59° 44 3.66"N	17° 43 13.50"E	2005.vi.24	2005.vii.16	alder swamp wood
Megaselia bifida	LA002	KP693290	KP693182	820	24	56° 36 32.88"N	14° 11 34.98"E	2003.ix.13	2003.xii.10	heath with old beeches
Megaselia bifida	LA003	KP693291	KP693183	1310	24	56° 36 32.88"N	14° 11 34.98"E	2004.vii.22	2004.ix.25	heath with old beeches
Megaselia bifida	LA004	KP693292	KP693184	1325	1000	56° 55 17.96''N	16° 6 4.42''E	2005.vii.18	2005.viii.02	old aspen in boulder terrain
Megaselia clemonsi	LA007	KP693293	KP693185	1565	1001	56° 55 53.07"N	16° 5 7.93"E	2006.iv.27	2006.v.18	old moisty haymaking meadow in forest edge
Megaselia hibernans	LA008	KP693244	KP693150	820	24	56° 36 32.88"N	14° 11 34.98"E	2003.ix.13	2003.xii.10	heath with old beeches
Megaselia hilaris	LA010	KP693294	KP693186	1610	9	59° 44 3.66"N	17° 43 13.50"E	2005.vi.24	2005.vii.16	alder swamp wood
Megaselia hilaris	LA011	KP693295	KP693187	1608	9	59° 44 3.66"N	17° 43 13.50"E	2005.v.28	2005.vi.11	alder swamp wood
Megaselia hilaris	LA012	KP693296	KP693188	1334	1001	56° 55 53.07"N	16° 5 7.93"E	2005.vii.18	2005.vii.25	old moisty haymaking meadow in forest edge
Megaselia hilaris	LA014	KP693297	KP693189	1332	1001	56° 55 53.07"N	16° 5 7.93"E	2005.vii.02	2005.vii.12	old moisty haymaking meadow in forest edge
Megaselia lata	LA018	KP693298	KP693190	822	24	56° 36 32.88"N	14° 11 34.98"E	2003.ix.13	2003.xii.10	heath with old beeches
Megaselia lata	LA021	KP693299	NA	1310	24	56° 36 32.88"N	14° 11 34.98"E	2004.vii.22	2004.ix.25	heath with old beeches
Megaselia lata	LA022	KP693245	NA	1325	1000	56° 55 17.96''N	16° 6 4.42''E	2005.vii.18	2005.viii.02	old aspen in boulder terrain
Megaselia n. sp. 2	LA024	KP693300	NA	234	20	56° 32.847''N	16° 34.635''E	2003.vii.20	2003.viii.12	alvar pasture
Megaselia lucifrons	LA025	KP693246	KP693151	1609	9	59° 44 3.66"N	17° 43 13.50"E	2005.vi.11	2005.vi.24	alder swamp wood
Megaselia lucifrons	LA026	KP693247	KP693152	1565	1001	56° 55 53.07"N	16° 5 7.93"E	2006.iv.27	2006.v.18	old moisty haymaking meadow in forest edge
Megaselia lucifrons	LA027	KP693248	KP693153	1361	1001	56° 55 53.07"N	16° 5 7.93"E	2005.viii.24	2005.ix.12	old moisty haymaking meadow in forest edge
Megaselia lucifrons	LA028	KP693249	KP693154	1565	1001	56° 55 53.07"N	16° 5 7.93"E	2006.iv.27	2006.v.18	old moisty haymaking meadow in forest edge
Megaselia oligoseta	LA029	KP693301	KP693191	1609	9	59° 44 3.66"N	17° 43 13.50"E	2005.vi.11	2005.vi.24	alder swamp wood
Megaselia oligoseta	LA030	KP693302	KP693192	1565	1001	56° 55 53.07"N	16° 5 7.93"E	2006.iv.27	2006.v.18	old moisty haymaking meadow in forest edge
Megaselia clemonsi	LA036	KP693303	KP693193	234	20	56° 32.847''N	16° 34.635''E	2003.vii.20	2003.viii.12	alvar pasture
Megaselia clemonsi	LA037	KP693304	KP693194	1565	1001	56° 55 53.07"N	16° 5 7.93"E	2006.iv.27	2006.v.18	old moisty haymaking meadow in forest edge
Megaselia subnitida	LA039	KP693250	KP693155	1606	9	59° 44 3.66"N	17° 43 13.50"E	2005.v.01	2005.v.15	alder swamp wood
Megaselia subnitida	LA041	KP693251	KP693156	1310	24	56° 36 32.88"N	14° 11 34.98"E	2004.vii.22	2004.ix.25	heath with old beeches
Megaselia subnitida	LA049	KP693252	KP693157	649	42	62° 19 0.06"N	13° 34 6.78"E	2004.iv.10	2004.v.21	alpine birch and spruce wood
Megaselia bifida	LA052	KP693305	NA	503	31	58° 8 27.36"N	11° 51 22.32"E			broad-leaved deciduous forest
Megaselia lucifrons	LA054	KP693253	KP693158	1247	53	64° 10 54.18"N	19° 33 22.14"E	2004.viii.05	2004.viii.20	Degerö stormyr, bog
Megaselia lucifrons	LA056	KP693254	KP693159	1289	59	64° 10 53.94" N	19° 33 32.88"E	2004.viii.05	2004.viii.20	bog edge of Degerö stormyr
Megaselia clemonsi	LA067	KP693306	KP693195	408	10	60° 22 0.00"N	15° 43 0.00"E	2004.v.13	2004.vi.18	alder wood ravine
Megaselia lata	LA071	KP693307	KP693196	1386	1003	59° 47 25.59"N	13° 24 54.61"E	2005.vi.18	2005.vi.27	old mixed deciduous forest in stream ravine
Megaselia lucifrons	LA073	KP693255	KP693160	1386	1003	59° 47 25.59"N	13° 24 54.61"E	2005.vi.18	2005.vi.27	old mixed deciduous forest in stream ravine
Megaselia albalucifrons n. sp.	LA074	KP693256	KP693161	408	10	60° 22 0.00"N	15° 43 0.00"E	2004.v.13	2004.vi.18	alder wood ravine
Megaselia oligoseta	LA076	KP693308	KP693197	1386	1003	59° 47 25.59"N	13° 24 54.61"E	2005.vi.18	2005.vi.27	old mixed deciduous forest in stream ravine
Megaselia clemonsi	LA077	KP693309	KP693198	408	10	60° 22 0.00"N	15° 43 0.00"E	2004.v.13	2004.vi.18	alder wood ravine
Megaselia subnitida	LA079	KP693257	KP693162	1386	1003	59° 47 25.59"N	13° 24 54.61"E	2005.vi.18	2005.vi.27	old mixed deciduous forest in stream ravine
Megaselia hibernans	LA080	KP693310	KP693199	1207	48	67° 3 6.18"N	20° 23 9.24"E	2004.vi.30	2004.vii.08	vaccinium vitis-idaea pine wood
Megaselia hibernans	LA082	KP693311	KP693200	215	60	64° 10 42.96"N	19° 35 11.52"E	2003.viii.01	2003.viii.18	25 yr old mixed coniferous forest
Megaselia hibernans	LA084	KP693312	KP693201	1209	48	67° 3 6.18"N	20° 23 9.24"E	2004.vii.29	2004.viii.13	vaccinium vitis-idaea pine wood
Megaselia hibernans	LA085	KP693313	KP693202	699	47	66° 46 10.32''N	20° 6 40.98''E	2004.vi.01	2004.vi.18	blueberry spruce forest
Megaselia lucifrons	LA086	KP693258	KP693163	407	10	60° 22 0.00"N	15° 43 0.00"E	2004.iv.15	2004.v.13	alder wood ravine
Megaselia lucifrons	LA087	KP693259	KP693164	1208	48	67° 3 6.18"N	20° 23 9.24"E	2004.vii.08	2004.vii.29	vaccinium vitis-idaea pine wood
Megaselia lata	LA094	KP693314	KP693203	515	31	58° 8 27.36"N	11° 51 22.32"E	2004.iv.14	2004.v.25	broad-leaved deciduous forest
Megaselia subnitida	LA095	KP693260	KP693165	1208	48	67° 3 6.18"N	20° 23 9.24"E	2004.vii.08	2004.vii.29	vaccinium vitis-idaea pine wood
Megaselia subnitida	LA097	KP693261	KP693166	407	10	60° 22 0.00"N	15° 43 0.00"E	2004.iv.15	2004.v.13	alder wood ravine
Megaselia subnitida	LA098	NA	KP693167	515	31	58° 8 27.36"N	11° 51 22.32"E	2004.iv.14	2004.v.25	broad-leaved deciduous forest
Megaselia n. sp.1	LA102	KP693315	KP693204	407	10	60° 22 0.00"N	15° 43 0.00"E	2004.iv.15	2004.v.13	alder wood ravine
Megaselia n. sp.1	LA103	KP693316	KP693205	515	31	58° 8 27.36"N	11° 51 22.32"E	2004.iv.14	2004.v.25	broad-leaved deciduous forest
Megaselia oligoseta	LA112	KP693317	KP693206	487	27	59° 58 17.46''N	18° 21 17.94''N	2004.vi.02	2004.vi.16	tall herbs and young trees mixed with old oaks
Megaselia oligoseta	LA114	KP693318	KP693207	2040	2006	56° 37 8.4''N	16° 29 50.35''E	2008.vii.12	2008.vii.24	field station
Megaselia oligoseta	LA115	KP693319	KP693208	1433	1000	56° 55 17.96''N	16° 6 4.42''E	2006.v.18	2006.vi.15	old aspen in boulder terrain
Megaselia oligoseta	LA116	KP693320	KP693209	1690	26	59° 34 10.02''N	19° 3 10.80''E	2005.v.27	2005.vi.26	maritime deciduous forest
Megaselia bifida	LA119	KP693321	KP693210	1672	24	56° 36 32.88"N	14° 11 34.98"E	2005.iv.30	2005.v.31	heath with old beeches
Megaselia hilaris	LA120	KP693322	KP693211	1690	26	59° 34 10.02''N	19° 3 10.80''E	2005.v.27	2005.vi.26	maritime deciduous forest
Megaselia hilaris	LA121	KP693323	KP693212	418	11	59° 56 31.02"N	16° 18 34.02"E	2004.vi.08	2004.vi.16	birches at Islingby, hay meadow
Megaselia hilaris	LA122	KP693324	KP693213	78	1	59° 10 18.78"N	18° 22 11.82"E	2003.vi.08	2003.vi.17	mixed coastal oak forest
Megaselia hibernans	LA123	KP693325	KP693214	1394	29	56° 56 2.16"N	18° 16 7.62"E	2005.vi.04	2005.vi.21	lichen pine forest
Megaselia hibernans	LA124	KP693326	KP693215	2031	2003	59° 47 25.59"N	13° 24 54.61"E	2006.ii.01	2006.v.24	cadaver dump
Megaselia hibernans	LA125	KP693327	KP693216	1672	24	56° 36 32.88"N	14° 11 34.98"E	2005.iv.30	2005.v.31	heath with old beeches
Megaselia hibernans	LA126	KP693328	KP693217	418	11	59° 56 31.02"N	16° 18 34.02"E	2004.vi.08	2004.vi.16	birches at Islingby, hay meadow
Megaselia lucifrons	LA128	KP693262	NA	515	31	58° 8 27.36"N	11° 51 22.32"E	2004.iv.14	2004.v.25	broad-leaved deciduous forest
Megaselia lata	LA129	KP693329	KP693218	1433	1000	56° 55 17.96''N	16° 6 4.42''E	2006.v.18	2006.vi.15	old aspen in boulder terrain
Megaselia impolluta	LA130	KP693330	KP693219	418	11	59° 56 31.02"N	16° 18 34.02"E	2004.vi.08	2004.vi.16	birches at Islingby, hay meadow
Megaselia clemonsi	LA131	KP693331	KP693220	1433	1000	56° 55 17.96''N	16° 6 4.42''E	2006.v.18	2006.vi.15	old aspen in boulder terrain
Megaselia clemonsi	LA132	KP693332	KP693221	2040	2006	56° 37 8.4''N	16° 29 50.35''E	2008.vii.12	2008.vii.24	field station
Megaselia clemonsi	LA133	KP693333	KP693222	2031	2003	59° 47 25.59"N	13° 24 54.61"E	2006.ii.01	2006.v.24	cadaver dump
Megaselia clemonsi	LA134	KP693334	KP693223	418	11	59° 56 31.02"N	16° 18 34.02"E	2004.vi.08	2004.vi.16	birches at Islingby, hay meadow
Megaselia subnitida	LA137	KP693263	KP693224	1207	48	67° 3 6.18"N	20° 23 9.24"E	2004.vi.30	2004.vii.08	vaccinium vitis-idaea pine wood
Megaselia subnitida	LA138	KP693335	KP693225	1210	48	67° 3 6.18"N	20° 23 9.24"E	2004.viii.13	2004.ix.01	vaccinium vitis-idaea pine wood
Megaselia subnitida	LA139	KP693264	KP693168	78	1	59° 10 18.78"N	18° 22 11.82"E	2003.vi.08	2003.vi.17	mixed coastal oak forest
Megaselia subnitida	LA140	KP693265	KP693169	727	51	64° 54 46.08"N	20° 29 59.04"E	2004.v.17	2004.vi.04	mixed boreal forest
Megaselia subnitida	LA141	KP693266	KP693170	1672	24	56° 36 32.88"N	14° 11 34.98"E	2005.iv.30	2005.v.31	heath with old beeches
Megaselia subnitida	LA142	KP693267	KP693171	1209	48	67° 3 6.18"N	20° 23 9.24"E	2004.vii.29	2004.viii.13	vaccinium vitis-idaea pine wood
Megaselia subnitida	LA144	KP693268	KP693172	215	60	64° 10 42.96"N	19° 35 11.52"E	2003.viii.01	2003.viii.18	25 yr old mixed coniferous forest
Megaselia lata	LA146	KP693336	KP693226	1433	1000	56° 55 17.96''N	16° 6 4.42''E	2006.v.18	2006.vi.15	old aspen in boulder terrain
Megaselia lata	LA151	KP693337	KP693227	1672	24	56° 36 32.88"N	14° 11 34.98"E	2005.iv.30	2005.v.31	heath with old beeches
Megaselia lucifrons	LA152	KP693269	KP693173	2031	2003	59° 47 25.59"N	13° 24 54.61"E	2006.ii.01	2006.v.24	cadaver dump
Megaselia lucifrons	LA153	KP693270	KP693174	1394	29	56° 56 2.16"N	18° 16 7.62"E	2005.vi.04	2005.vi.21	lichen pine forest
Megaselia lucifrons	LA155	KP693271	KP693175	418	11	59° 56 31.02"N	16° 18 34.02"E	2004.vi.08	2004.vi.16	birches at Islingby, hay meadow
Megaselia lucifrons	LA159	KP693272	KP693176	1210	48	67° 3 6.18"N	20° 23 9.24"E	2004.viii.13	2004.ix.01	vaccinium vitis-idaea pine wood
Megaselia lucifrons	LA161	KP693273	KP693177	2040	2006	56° 37 8.4''N	16° 29 50.35''E	2008.vii.12	2008.vii.24	field station
Megaselia hilaris	LA162	KP693338	KP693228	1690	26	59° 34 10.02''N	19° 3 10.80''E	2005.v.27	2005.vi.26	maritime deciduous forest
Megaselia hibernans	LA169	KP693339	KP693229	1565	1001	56° 55 53.07"N	16° 5 7.93"E	2006.iv.27	2006.v.18	old moisty haymaking meadow in forest edge
Megaselia clemonsi	LA171	KP693340	KP693230	1433	1000	56° 55 17.96''N	16° 6 4.42''E	2006.v.18	2006.vi.15	old aspen in boulder terrain
Megaselia impolluta	LA172	KP693341	KP693231	418	11	59° 56 31.02"N	16° 18 34.02"E	2004.vi.08	2004.vi.16	birches at Islingby, hay meadow
Megaselia impolluta	LA173	KP693342	KP693232	418	11	59° 56 31.02"N	16° 18 34.02"E	2004.vi.08	2004.vi.16	birches at Islingby, hay meadow
Megaselia impolluta	LA174	KP693343	KP693233	418	11	59° 56 31.02"N	16° 18 34.02"E	2004.vi.08	2004.vi.16	birches at Islingby, hay meadow
Megaselia impolluta	LA175	KP693344	NA	418	11	59° 56 31.02"N	16° 18 34.02"E	2004.vi.08	2004.vi.16	birches at Islingby, hay meadow
Megaselia impolluta	LA176	KP693345	NA	418	11	59° 56 31.02"N	16° 18 34.02"E	2004.vi.08	2004.vi.16	birches at Islingby, hay meadow
Megaselia impolluta	LA177	KP693346	NA	418	11	59° 56 31.02"N	16° 18 34.02"E	2004.vi.08	2004.vi.16	birches at Islingby, hay meadow
Megaselia lucifrons	LA180	KP693274	KP693178	515	31	58° 8 27.36"N	11° 51 22.32"E	2004.iv.14	2004.v.25	broad-leaved deciduous forest
Megaselia n. sp. 2	LA181	KP693348	KP693235	1498	20	56° 32.847''N	16° 34.635''E	2005.vii.05	2005.viii.02	alvar pasture
Megaselia n. sp.1	LA188	KP693349	KP693236	487	27	59° 58 17.46''N	18° 21 17.94''N	2004.vi.02	2004.vi.16	tall herbs and young trees mixed with old oaks
Megaselia n. sp.1	LA190	KP693350	KP693237	1433	1000	56° 55 17.96''N	16° 6 4.42''E	2006.v.18	2006.vi.15	old aspen in boulder terrain
Megaselia n. sp.1	LA192	KP693351	KP693238	1433	1000	56° 55 17.96''N	16° 6 4.42''E	2006.v.18	2006.vi.15	old aspen in boulder terrain
Megaselia n. sp.1	LA193	KP693352	KP693239	515	31	58° 8 27.36"N	11° 51 22.32"E	2004.iv.14	2004.v.25	broad-leaved deciduous forest
Megaselia n. sp.1	LA194	KP693353	KP693240	515	31	58° 8 27.36"N	11° 51 22.32"E	2004.iv.14	2004.v.25	broad-leaved deciduous forest
Megaselia n. sp.1	LA195	KP693354	KP693241	515	31	58° 8 27.36"N	11° 51 22.32"E	2004.iv.14	2004.v.25	broad-leaved deciduous forest
Megaselia lucifrons	LA196	KP693355	KP693179	764	5	59° 10 35.52"N	17° 59 37.86"E	2004.vi.16	2004.vi.30	pine forest with garbage
Megaselia lucifrons	LA197	KP693275	KP693180	764	5	59° 10 35.52"N	17° 59 37.86"E	2004.vi.16	2004.vi.30	pine forest with garbage
Megaselia n. sp.1	LA199	KP693356	KP693242	353	5	59° 10 35.52"N	17° 59 37.86"E	2004.v.18	2004.vi.07	pine forest with garbage
Megaselia clemonsi	LA202	KP693357	KP693243	1464	28	57° 32 12.42''N	18° 20 16.38''N	2005.iv.10	2005.vi.06	border between mixed pine forest and open grazed calcerous pasture
Megaselia n. sp.1	LA205	KP693358	NA	543	33	57.505200N	11.925733E	2004.iv.28	2004.v.14	oak and pine forest
Megaselia albalucifrons n. sp.	LA206	KP693276	NA	1209	48	67° 3 6.18"N	20° 23 9.24"E	2004.vii.29	2004.viii.13	vaccinium vitis-idaea pine wood
Megaselia lucifrons	LA207	KP693277	NA	1672	24	56° 36 32.88"N	14° 11 34.98"E	2005.iv.30	2005.v.31	heath with old beeches
Megaselia subnitida	LA208	KP693278	NA	NA	NA	56° 56 6.8''N	15° 54 58.97''E	18.v.2010	18.v.2010	on window
Megaselia subnitida	LA209	KP693279	NA	NA	NA	56° 56 6.8''N	15° 54 58.97''E	18.v.2010	18.v.2010	on window, female
Megaselia lucifrons	LA211	KP693280	NA	1672	24	56° 36 32.88"N	14° 11 34.98"E	2005.iv.30	2005.v.31	heath with old beeches
Megaselia albalucifrons n. sp.	LA212	KP693281	NA	1672	24	56° 36 32.88"N	14° 11 34.98"E	2005.iv.30	2005.v.31	heath with old beeches
Megaselia lucifrons	LA213	KP693282	NA	1672	24	56° 36 32.88"N	14° 11 34.98"E	2005.iv.30	2005.v.31	heath with old beeches
Megaselia albalucifrons n. sp.	LA214	KP693283	NA	1672	24	56° 36 32.88"N	14° 11 34.98"E	2005.iv.30	2005.v.31	heath with old beeches
Megaselia albalucifrons n. sp.	LA215	KP693284	NA	1672	24	56° 36 32.88"N	14° 11 34.98"E	2005.iv.30	2005.v.31	heath with old beeches
Megaselia albalucifrons n. sp.	LA216	KP693285	NA	1672	24	56° 36 32.88"N	14° 11 34.98"E	2005.iv.30	2005.v.31	heath with old beeches
Megaselia lucifrons	LA217	KP693286	NA	1672	24	56° 36 32.88"N	14° 11 34.98"E	2005.iv.30	2005.v.31	heath with old beeches
Megaselia lucifrons	LA219	KP693287	NA	1672	24	56° 36 32.88"N	14° 11 34.98"E	2005.iv.30	2005.v.31	heath with old beeches
Megaselia lucifrons	LA220	KP693288	NA	1672	24	56° 36 32.88"N	14° 11 34.98"E	2005.iv.30	2005.v.31	heath with old beeches
